# Supplementary material for: Epidemiology and preclinical management of dog bites among humans in Wakiso and Kampala districts, Uganda: Implications for prevention of dog bites and rabies
Source: PubMed Central journal article supplement (PMC7505423; doi:10.1371/journal.pone.0239090), 2020-09-21
Supplement: pone.0239090.s004.pdf [file pone.0239090.s004.pdf]

# APPENDIX IV: INTERVIEW QUESTIONNAIRE ON FACTORS ASSOCIATED WITH PRE-CLINICAL CARE PRACTICES UNDERTAKEN BY DOG BITE PATIENTS

## Appendix IVa: English Version

Date (DD/MM/YY) ..... Time respondent had reported to hospital:.....

**A. RESEARCH SITE / HOSPITAL NAME :** .....

Hospital code: .....

### B. RESPONDENT DETAILS

**Name code of patient:** .....

**Residence codes:** Village :.....Sub county :.....

**Landmark to home (please describe) :** .....

**Contact details:** Telephone 1 :.....Telephone 2: .....

**Name of next of kin:** Surname :.....

Last name :.....

**Contact details of next of kin :** Telephone 1 :.....

Telephone 2 :.....

**Date of birth:** Can tell [ ] Cannot remember [ ] Prefers not to say [ ]

**If can tell :** Date of birth (DD/MM/YY) : .....

If exact date of birth cannot be recalled, what month and year were you born?

(MM/YY).....

**C. HUMAN FACTORS**

**Sex :** Male [ ] Female [ ]

**Tribe :** .....

**Religion :** Christian [ ] Moslem [ ] Other ..... (please specify)

**Highest education level attained :** No formal education [ ] Primary [ ] Secondary [ ]

Certificate / Diploma [ ] Degree and above [ ]

**Marital status :** Single never married [ ] Single divorced / widowed [ ] Married [ ]  
Prefer not to say [ ]

**Height of respondent (cm) :**.....

**Weight of respondent (kg) :**.....

**How many people stay in the household with you?**.....

**Do the people staying in your household include your spouse?** Yes [ ] No [ ]

**Are there teenage children in your home?** Yes [ ] No [ ]

If yes, how many teenage children in your home? .....

**Are you employed?** Yes [ ] No [ ]

If yes, please specify type of employment .....

**What is your caretaker’s sex?** Male [ ] Female [ ]

**What is your caretaker’s education level?** No formal education [ ] Primary [ ] Secondary [ ]

Certificate / Diploma [ ] Degree and above [ ]

**Are you a Current dog owner?** Yes [ ] No [ ]

If yes, how many dogs do you own ? .....

If yes, what type / breed of dog?.....

What do you use the dog for? .....

How many years have you been owning the dog (s)?.....

**If no, have you ever owned a dog?** Yes [ ] No [ ]

**If yes, where do the dogs stay?** Have own house [ ] Out in the compound [ ]

Share house with people [ ] Roam around in the village [ ]

**Do you know of any close relative of yours who own a dog?** Yes [ ] No [ ]

**Have you ever been bitten by a dog before this bite?** Yes [ ] No [ ]

If yes, in which year did this bite happen ? .....

**For this current bite, did you believe before that a dog could attack and bite you ?** Yes [ ] No [ ]

**Were you immunized against rabies prior to being bitten by the dog?** Yes [ ] No [ ]

If yes, when were you immunized (month and year)? .....

#### **D. DOG FACTORS**

**What was the sex of the dog?** Male [ ] Female [ ] Don't know [ ]

What is the age of the biting dog (months) .....

**Was the biting dog sick?** Yes [ ] No [ ]

**Was the biting dog exhibiting fear of people?** Yes [ ] No [ ]

**What is the dog used for?** Security [ ] Pet [ ] Stray [ ] Dont know [ ]

**Was the dog vaccinated to the best of your knowledge?** Yes [ ] No [ ] Dont know [ ]

**Was the dog spayed / neutered / castrated?** Yes [ ] No [ ] Don't know [ ]

**Was the dog on the leash?** Yes [ ] No [ ]

**Has this dog ever bitten someone else before biting you?** Yes [ ] No [ ] Don't know [ ]

**Did this dog bite another person after biting you?** Yes [ ] No [ ] Don't know [ ]

**E. DOG BITE CIRCUMSTANCES**

**E1: Before the bite**

**What day did the dog bite you?** (DD/MM/YY) .....

**What time of day did the dog bite you?** Morning [ ] Evening [ ] Night [ ]

**At what particular time did the dog bite you ?** (12-hour format) .....

**What it raining when you were attacked by the dog ?** Yes [ ] No [ ]

**If the attack happended at night, was there a visible moon ?** Yes [ ] No [ ]

**Were you bitten by your own dog?** Yes [ ] No [ ]

If yes, how long had you stayed with the dog before the bite (months) .....

**If yes, was this dog borne in your home ?** Yes [ ] No [ ]

**If yes, do you usually allow this dog into the presence of visitors ?** Yes [ ] No [ ]

**Does this dog usually leave the compound unaccompanied?** Yes [ ] No [ ]

**If no, do you know the owner of the dog?** Yes [ ] No [ ]

**If yes, who is the owner ?** Neighbor [ ] Person known to me [ ] Community dog [ ]

**Were you bitten while on the property of the dog owner ?** Yes [ ] No [ ]

**Was the owner around while the dog was attacking you?** Yes [ ] No [ ]

**How would you describe the size of the dog?** Small [ ] Medium [ ] Large [ ] Very large [ ]

**Do you know the breed of the dog ?** Yes [ ] No [ ]

If yes, what breed was the dog ? .....

**Did you previously know the biting dog?** Yes [ ] No [ ]

If yes, can you describe the dog? History and type.....

**Did the dog look sick to you?** Ye [ ] No [ ]

**Where were you?**

Own home [ ] Home of another person known to me [ ] Home of another person not known to me [ ] On the road [ ] Other [ ] , please specify .....

**Were you in company of another person / people?** Yes [ ] No [ ]

If yes, what is your relationship with these / this person (s)? .....

**What were you doing just before the dog bit you?** Walking [ ] Seated [ ] Chasing it away [ ]

Feeding it [ ] Other [ ] , please specify .....

**What was the dog doing just before the bite?** Please describe .....

.....

**Did you try to interpret the mood of the dog before the attack?** Yes [ ] No [ ]

Could you describe to me how you thought the dog’s demeanor / mood was just before the bite?

.....

**E2. During the bite**

**Did you approach the dog or did it approach you?** I approached it [ ] It approached me [ ]

Was the dog stationary [ ] or moving / mobile [ ]

What was the purpose of the interaction with the dog around the time of the bite? .....

.....

**Did you try to fend off the dog as it attacked you?** Yes [ ] No [ ]

**Where did it bite you?** Leg [ ] Hand [ ] Arm [ ] Head [ ] Abdomen [ ]

Other, please specify .....

**How many times did it bite you?** One [ ] Two [ ] Three or more [ ]

**How do you describe the depth of the wounds?** Deep [ ] Medium [ ] Superficial [ ]

Other [ ] , please specify .....

**Why do you think that the dog bit you?** .....

**What makes you think that?** .....

**Do you get information about dogs?** Yes [ ] No [ ]

**Where do you get information about dogs from?** Friends [ ] Books [ ] School [ ] Family [ ]

Other [ ], please specify.....

**Do you think that the bite was intentional?** Yes [ ] No [ ]

**Do you think that anybody is to blame for the bite happening?** Yes [ ] No [ ]

If yes, who? .....

### **E3. After the bite**

How would you describe the damage the bite did to you? .....

**What did you do to the dog after the bite?** Chased it away [ ] Killed it [ ] Nothing [ ]

It ran away by itself [ ] Other [ ], please specify .....

**If it was killed, what happened to the carcass ?** Decapitated [ ] Buried [ ] Left to rot [ ]

I don't know [ ] Other [ ], please specify .....

**Are you aware the head of the dog had to be taken for examination ?** Yes [ ] No [ ]

**If yes, was the head take for examination?** Yes [ ] No [ ]

If not own dog, how did the owner react? .....

How did the owner's reaction make you feel? .....

How did the bite affect the rest of your day? .....

### **F. PRACTICES**

**Did you do anything to the wound immediately after the bite?** Yes [ ] No [ ]

**If yes, what did you do?**Washed with water and soap [ ] Washed with water only [ ]

Did not wash [ ] Other, please specify .....

**Did you apply anything to the wound immediately after the bite?** Yes [ ] No [ ]

If yes, what did you apply to the wound? .....

**Did you think you needed any medical help after the bite?** Yes [ ] No [ ]

If yes, what did you do? .....

Why did you choose to do that? .....

**G. SES variables**

Could you tell me if you have the following in your house;

| Item                                            | Yes | No |
|-------------------------------------------------|-----|----|
| Radio                                           |     |    |
| Television                                      |     |    |
| Cell-phone                                      |     |    |
| Bicycle                                         |     |    |
| Motorcyle                                       |     |    |
| Motor vehicle                                   |     |    |
| A piece of land                                 |     |    |
| Large farm animals like cattle, goats and sheep |     |    |
| Small farm animals like poultry                 |     |    |
| A manufactured bed                              |     |    |

**What is the nature of the walls of their house?**

No bricks [ ] Unburnt bricks [ ] Burnt bricks with mud [ ]

Burnt bricks/stones with cemen [ ] Other [ ] , please specify .....
